# Supplementary material for: Lactobacillus plantarum HAC01 ameliorates type 2 diabetes in high-fat diet and streptozotocin-induced diabetic mice in association with modulating the gut microbiota
Source: Royal Society of Chemistry journal article supplement (doi:10.1039/d1fo00698c), 2021-01-01
Supplement: d1fo00698c1.pdf [file d1fo00698c1.pdf]

## Table S1.

Table S1. Ingredients of HFD (D12492, Research diet)

| Class description | Ingredients                         | Grams   | Caloric information (Kcal) |
|-------------------|-------------------------------------|---------|----------------------------|
| Protein           | Casein, Latic, 30 Mesh              | 200.00g | 20% Kcal                   |
|                   | Cystine, L                          | 3.00g   |                            |
| Carbohydrate      | Lodex 10                            | 125.00g | 20% Kcal                   |
|                   | Sucrose, Fine Granulated            | 72.80g  |                            |
| Fiber             | Solka Floc, FCC200                  | 50.00g  |                            |
| Fat               | Lard                                | 245.00g | 60% Kcal                   |
|                   | Soybean Oil, USP                    | 25.00g  |                            |
| Mineral           | S10026B                             | 50.00g  |                            |
| Vitamin           | Choline Bitartrate                  | 2.00g   |                            |
|                   | V10001C                             | 1.00g   |                            |
| Dye               | Dye, Blue FD&C#1, Alum. Lake 35-42% | 0.05g   |                            |
| Total             |                                     | 773.85g |                            |
| Energy density    |                                     |         | 5.21 Kcal/g                |

Figure S1.

(A)

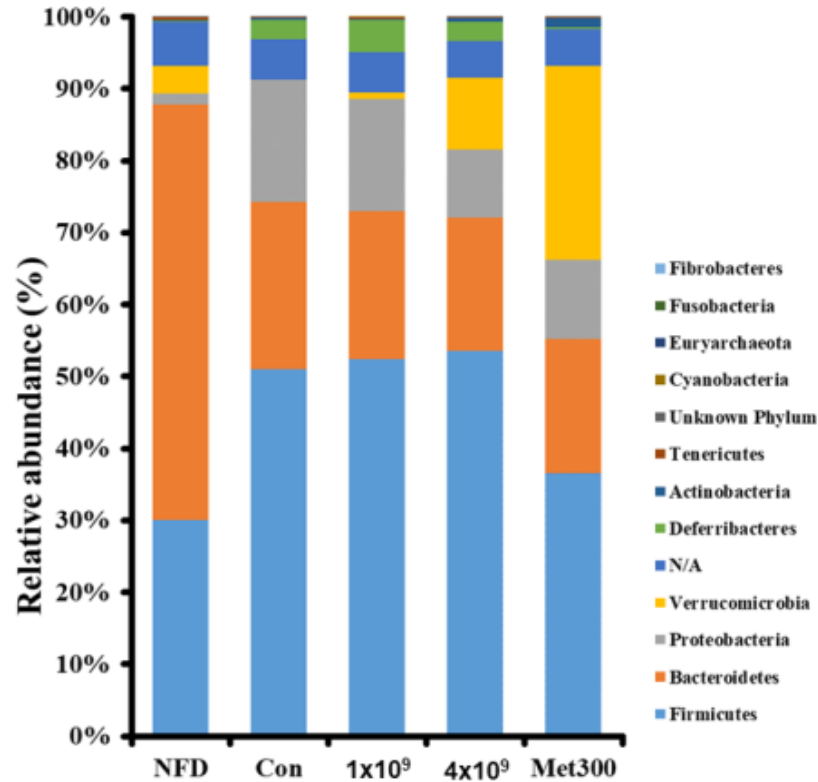

(B)

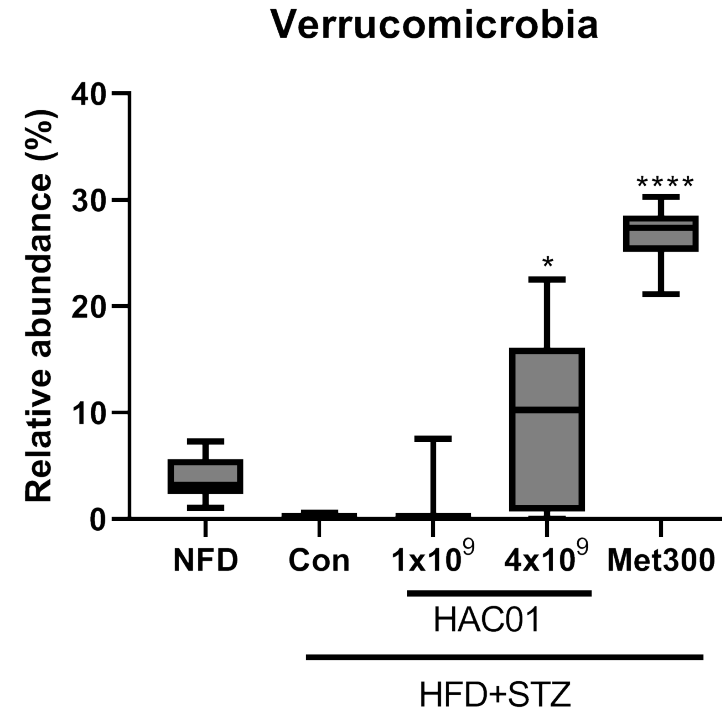

Figure S1. Changes in fecal bacterial community in *L. plantarum* HAC01 treated group and the metformin treated group with diabetes induced mouse. (A) Average relative abundance of the phylum level in each group. (B) Relative abundance of the phylum Verrucomicrobia in each group NFD: Normal fat diet; HFD+STZ\_Con: High-fat diet + streptozotocin (STZ); HFD+STZ\_1x10<sup>9</sup>-4x10<sup>9</sup>HAC01: HFD+STZ + 1x10<sup>9</sup>- 4x10<sup>9</sup>CFU/day *L. plantarum* HAC01; Met300: Metformin 300 mg/kg. The ends of the whiskers represent the minimum and maximum, the bottom and top of the box are the 1st and 3rd quartiles, and the line within the box is the median. Statistical significance was as follows: \*p<0.05 and \*\*\*\*p<0.0001 vs Con (n=10 per group).

Figure S2.

(A)

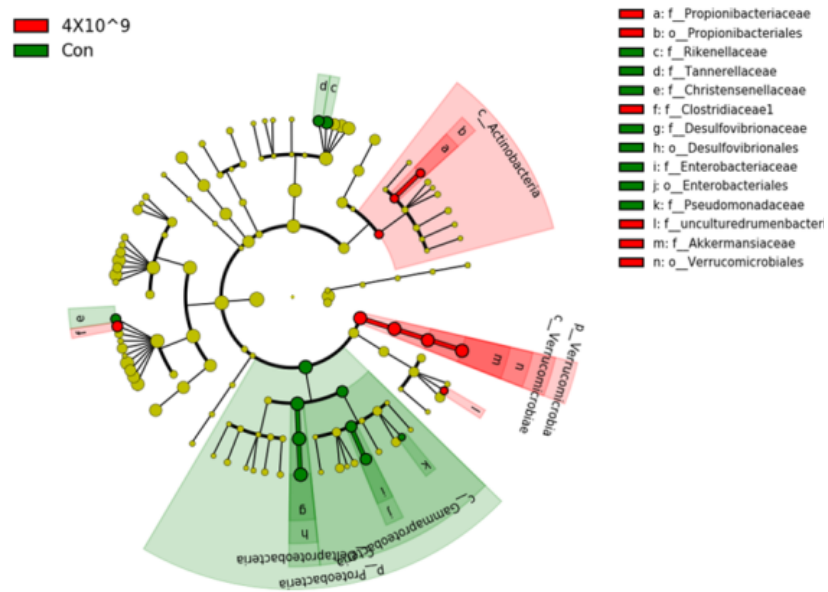

(B)

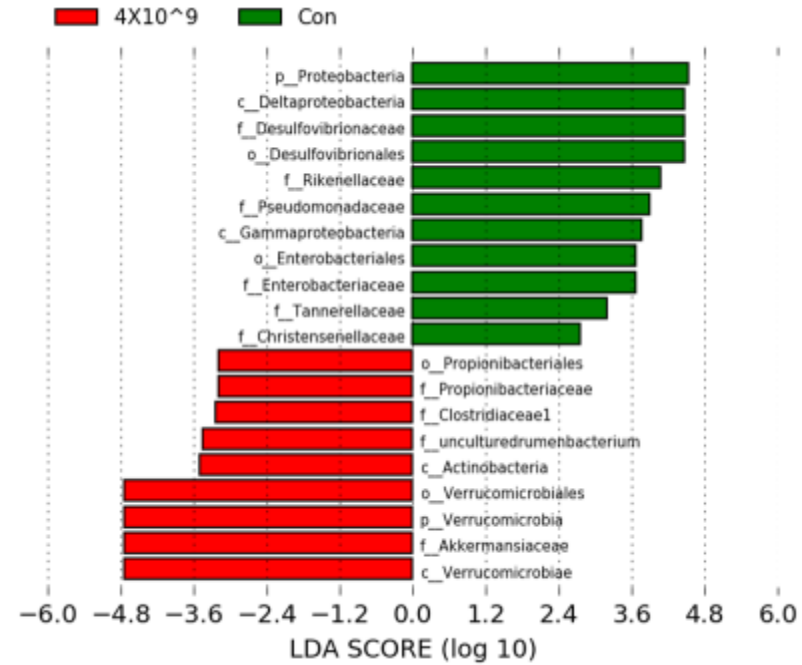

Figure S2. LEfSe analysis of fecal microbiota in *L. plantarum* 4 x 10<sup>9</sup> HAC01-treated group and control group. (A) Cladogram generated by LEfSe indicating differences at phylum, class, and family levels between the two groups. Regions in green indicate taxa enriched in high fat diet and streptozotocin affected while regions in red indicate taxa enriched in 4 x 10<sup>9</sup> HAC01-treated group. Differing taxa are listed on the right side of the cladogram. (B) Bar graph showing LDA scores. Significance determined using default parameters (Kruskal Wallis test  $p < 0.05$  and LDA score  $> 2$ ).

Figure S3.

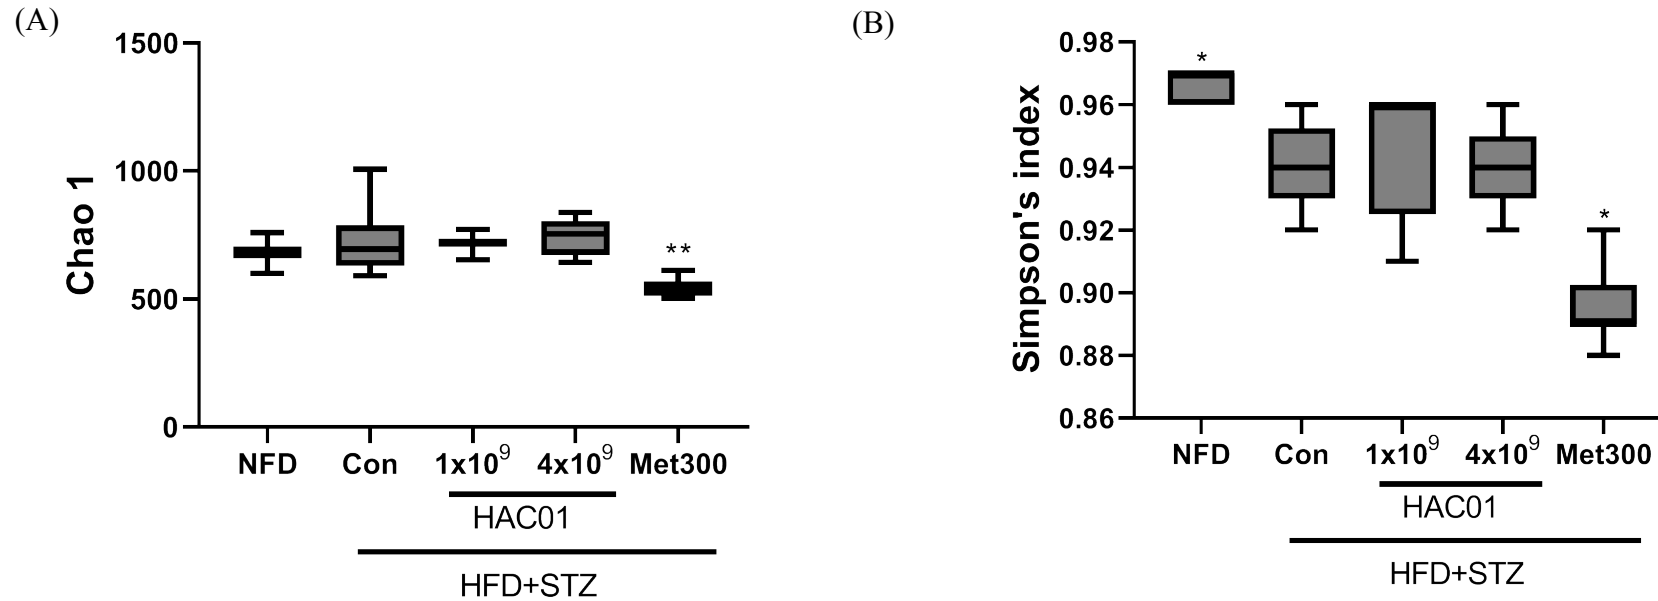

Figure S3. The richness and diversity of *L. plantarum* HAC01 treated group and the metformin treated group with diabetes induced mouse. (A) Chao 1. (B) Simpson's index. NFD: Normal fat diet; HFD+STZ\_Con: High-fat diet + streptozotocin (STZ); HFD+STZ\_1x10<sup>9</sup>-4x10<sup>9</sup> HAC01: HFD+STZ + 1x10<sup>9</sup>- 4x10<sup>9</sup> CFU/day *L. plantarum* HAC01; Met300: Metformin 300 mg/kg. The ends of the whiskers represent the minimum and maximum, the bottom and top of the box are the 1st and 3rd quartiles, and the line within the box is the median. Statistical significance was as follows: \* $p < 0.05$  and \*\* $p < 0.01$  vs Con (n=10 per group).

Figure S4.

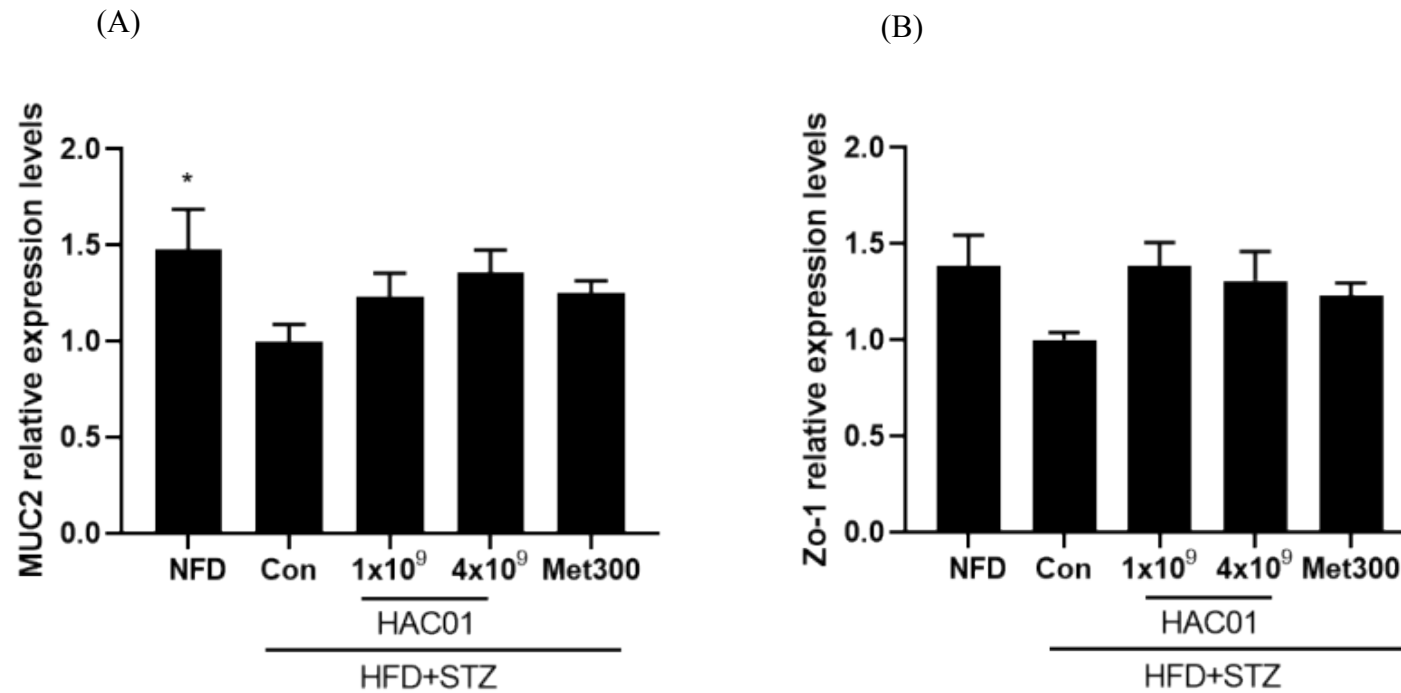

Figure S4. Effect of *L. plantarum* HAC01 on gut permeability in HFD+STZ-induced diabetic mice. (A) MUC2 mRNA expression levels and (B) Zo-1 mRNA expression levels.

NFD: Normal fat diet; HFD+STZ\_Con: High-fat diet + streptozotocin (STZ); HFD + STZ\_1x10<sup>9</sup>-4x10<sup>9</sup> HAC01: HFD + STZ +1x10<sup>9</sup>-4x10<sup>9</sup> CFU/day *L. plantarum* HAC01;

Met300: Metformin 300 mg/kg. Data are expressed as mean  $\pm$  SEM (n=10). \* $p$ <0.05 vs the HFD + STZ\_Con group.
